# Supplementary material for: Identification of Regulatory circRNAs Involved in the Pathogenesis of Acute Myocardial Infarction
Source: Front Genet. 2021 Feb 3;11:626492. doi: 10.3389/fgene.2020.626492 (PMC7886988; doi:10.3389/fgene.2020.626492)
Supplement: Supplementary Table 1 — Identification of miRNA-circRNA pairs. Differentially expressed circRNAs identified in microarray analysis and dysregulated miRNAs identified in GSE 31568 between AMI and ctrl by application of miRanda; 97 circRNAs have binding sites with miRNAs. [file Table_1.XLSX]

## Sheet: Sheet1
miRNA	circRNA	CircRNA direction
hsa-miR-1290	hsa_circRNA_402265	Downregulation
hsa-miR-135a	hsa_circRNA_101231	Downregulation
hsa-miR-223*	hsa_circRNA_103493	Downregulation
hsa-miR-27a	hsa_circRNA_103757	Downregulation
hsa-miR-27a	hsa_circRNA_103756	Downregulation
hsa-miR-299-3p	hsa_circRNA_100562	Downregulation
hsa-miR-30e*	hsa_circRNA_103109	Downregulation
hsa-miR-330-5p	hsa_circRNA_101231	Downregulation
hsa-miR-340*	hsa_circRNA_104418	Downregulation
hsa-miR-369-5p	hsa_circRNA_103045	Downregulation
hsa-miR-375	hsa_circRNA_104419	Downregulation
hsa-miR-483-3p	hsa_circRNA_102611	Downregulation
hsa-miR-508-3p	hsa_circRNA_104645	Downregulation
hsa-miR-508-3p	hsa_circRNA_100257	Downregulation
hsa-miR-578	hsa_circRNA_103560	Downregulation
hsa-miR-578	hsa_circRNA_103758	Downregulation
hsa-miR-578	hsa_circRNA_103045	Downregulation
hsa-miR-609	hsa_circRNA_100923	Downregulation
hsa-miR-609	hsa_circRNA_103309	Downregulation
hsa-miR-924	hsa_circRNA_103109	Downregulation
hsa-miR-942	hsa_circRNA_103044	Downregulation
hsa-let-7f-1*	hsa_circRNA_406698	Upregulation
hsa-let-7f-1*	hsa_circRNA_004225	Upregulation
hsa-miR-100*	hsa_circRNA_404595	Upregulation
hsa-miR-100*	hsa_circRNA_101306	Upregulation
hsa-miR-1245	hsa_circRNA_003997	Upregulation
hsa-miR-1256	hsa_circRNA_100891	Upregulation
hsa-miR-1278	hsa_circRNA_404818	Upregulation
hsa-miR-1283	hsa_circRNA_406010	Upregulation
hsa-miR-1305	hsa_circRNA_406283	Upregulation
hsa-miR-136*	hsa_circRNA_400027	Upregulation
hsa-miR-136*	hsa_circRNA_104121	Upregulation
hsa-miR-139-5p	hsa_circRNA_102838	Upregulation
hsa-miR-145*	hsa_circRNA_406237	Upregulation
hsa-miR-145*	hsa_circRNA_406988	Upregulation
hsa-miR-188-3p	hsa_circRNA_001350	Upregulation
hsa-miR-1912	hsa_circRNA_404807	Upregulation
hsa-miR-192*	hsa_circRNA_004561	Upregulation
hsa-miR-200a	hsa_circRNA_100395	Upregulation
hsa-miR-200a	hsa_circRNA_003997	Upregulation
hsa-miR-20a*	hsa_circRNA_063013	Upregulation
hsa-miR-20a*	hsa_circRNA_000781	Upregulation
hsa-miR-20a*	hsa_circRNA_406655	Upregulation
hsa-miR-214	hsa_circRNA_001654	Upregulation
hsa-miR-214	hsa_circRNA_103444	Upregulation
hsa-miR-217	hsa_circRNA_092435	Upregulation
hsa-miR-217	hsa_circRNA_100395	Upregulation
hsa-miR-217	hsa_circRNA_102312	Upregulation
hsa-miR-298	hsa_circRNA_001397	Upregulation
hsa-miR-300	hsa_circRNA_406698	Upregulation
hsa-miR-300	hsa_circRNA_001653	Upregulation
hsa-miR-330-3p	hsa_circRNA_092435	Upregulation
hsa-miR-330-3p	hsa_circRNA_404595	Upregulation
hsa-miR-330-3p	hsa_circRNA_406010	Upregulation
hsa-miR-330-3p	hsa_circRNA_405443	Upregulation
hsa-miR-33a	hsa_circRNA_063013	Upregulation
hsa-miR-371-5p	hsa_circRNA_001264	Upregulation
hsa-miR-455-3p	hsa_circRNA_000864	Upregulation
hsa-miR-455-3p	hsa_circRNA_063013	Upregulation
hsa-miR-455-3p	hsa_circRNA_006773	Upregulation
hsa-miR-488*	hsa_circRNA_101522	Upregulation
hsa-miR-491-3p	hsa_circRNA_406698	Upregulation
hsa-miR-509-5p	hsa_circRNA_404818	Upregulation
hsa-miR-512-5p	hsa_circRNA_102445	Upregulation
hsa-miR-512-5p	hsa_circRNA_406698	Upregulation
hsa-miR-512-5p	hsa_circRNA_404818	Upregulation
hsa-miR-520d-5p	hsa_circRNA_406010	Upregulation
hsa-miR-541	hsa_circRNA_001409	Upregulation
hsa-miR-548p	hsa_circRNA_087800	Upregulation
hsa-miR-548p	hsa_circRNA_406655	Upregulation
hsa-miR-591	hsa_circRNA_043602	Upregulation
hsa-miR-603	hsa_circRNA_004561	Upregulation
hsa-miR-603	hsa_circRNA_000864	Upregulation
hsa-miR-603	hsa_circRNA_092523	Upregulation
hsa-miR-603	hsa_circRNA_404595	Upregulation
hsa-miR-603	hsa_circRNA_406010	Upregulation
hsa-miR-603	hsa_circRNA_405624	Upregulation
hsa-miR-603	hsa_circRNA_003997	Upregulation
hsa-miR-603	hsa_circRNA_406698	Upregulation
hsa-miR-603	hsa_circRNA_400033	Upregulation
hsa-miR-603	hsa_circRNA_091761	Upregulation
hsa-miR-603	hsa_circRNA_000742	Upregulation
hsa-miR-603	hsa_circRNA_404818	Upregulation
hsa-miR-603	hsa_circRNA_001654	Upregulation
hsa-miR-621	hsa_circRNA_002904	Upregulation
hsa-miR-646	hsa_circRNA_091761	Upregulation
hsa-miR-646	hsa_circRNA_000895	Upregulation
hsa-miR-646	hsa_circRNA_100891	Upregulation
hsa-miR-767-5p	hsa_circRNA_406283	Upregulation
hsa-miR-767-5p	hsa_circRNA_004077	Upregulation
hsa-miR-802	hsa_circRNA_400564	Upregulation
hsa-miR-802	hsa_circRNA_406698	Upregulation
hsa-miR-802	hsa_circRNA_103444	Upregulation
hsa-miR-922	hsa_circRNA_405624	Upregulation
hsa-miR-922	hsa_circRNA_001654	Upregulation
hsa-miR-922	hsa_circRNA_103444	Upregulation
hsa-miR-93*	hsa_circRNA_104757	Upregulation
